# Supplementary material for: Elevated tau in the piriform cortex in Alzheimer's but not Parkinson's disease using PET‐MR
Source: PubMed Central journal article supplement — Alzheimers Dement (Amst). 2024 Nov 23;16(4):e70040. doi: 10.1002/dad2.70040 (PMC11585164; doi:10.1002/dad2.70040), 2024-11-23
Supplement: DAD2-16-e70040-s003.pdf [file DAD2-16-e70040-s003.pdf]

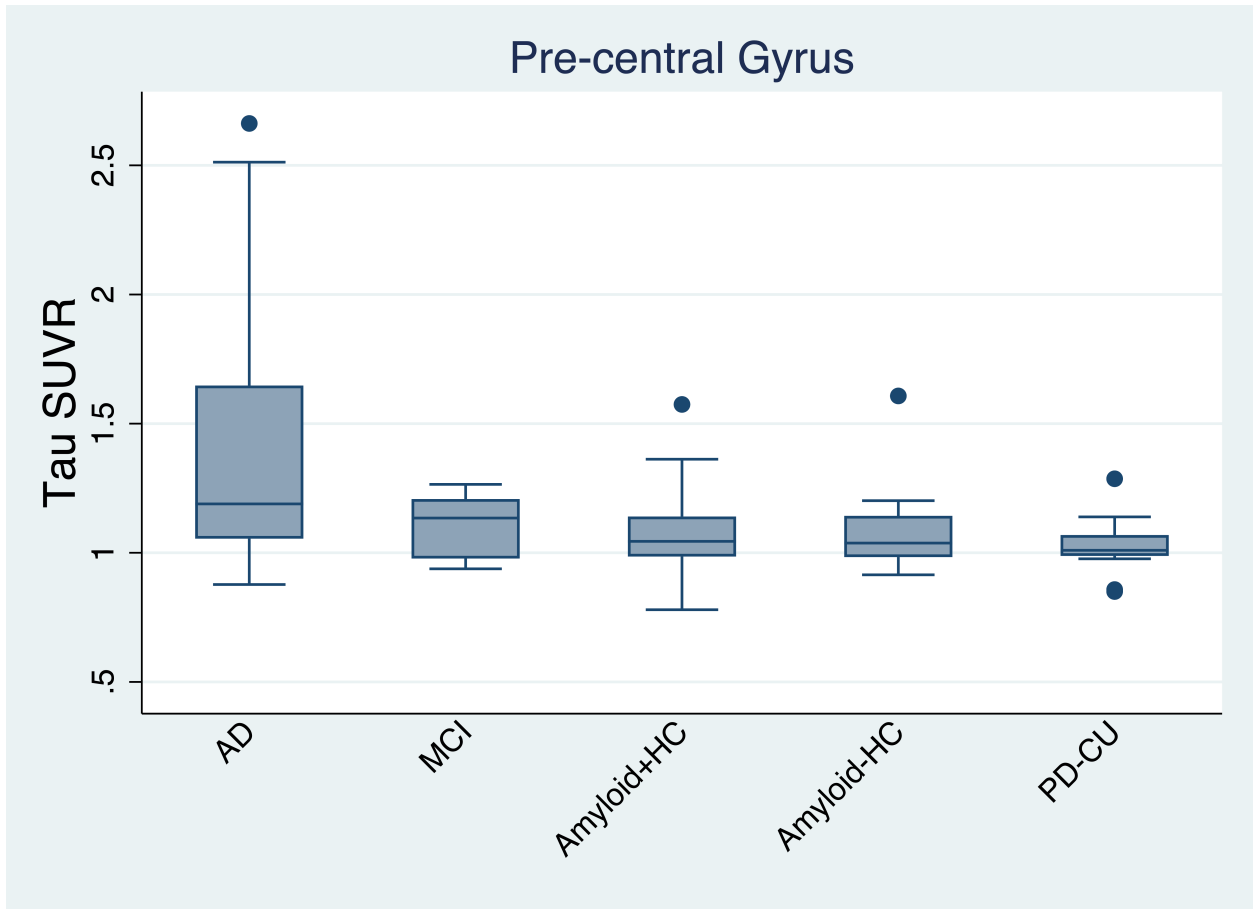

**Figure S3:** Tau uptake in the bilateral precentral gyri control reference region. There was a similar gradation of tau uptake ( $p=0.003$ ), but if the AD category was excluded, no significant difference existed ( $p=0.172$ ).
