# Supplementary material for: Elevated tau in the piriform cortex in Alzheimer's but not Parkinson's disease using PET‐MR
Source: PubMed Central journal article supplement — Alzheimers Dement (Amst). 2024 Nov 23;16(4):e70040. doi: 10.1002/dad2.70040 (PMC11585164; doi:10.1002/dad2.70040), 2024-11-23
Supplement: DAD2-16-e70040-s006.pdf [file DAD2-16-e70040-s006.pdf]

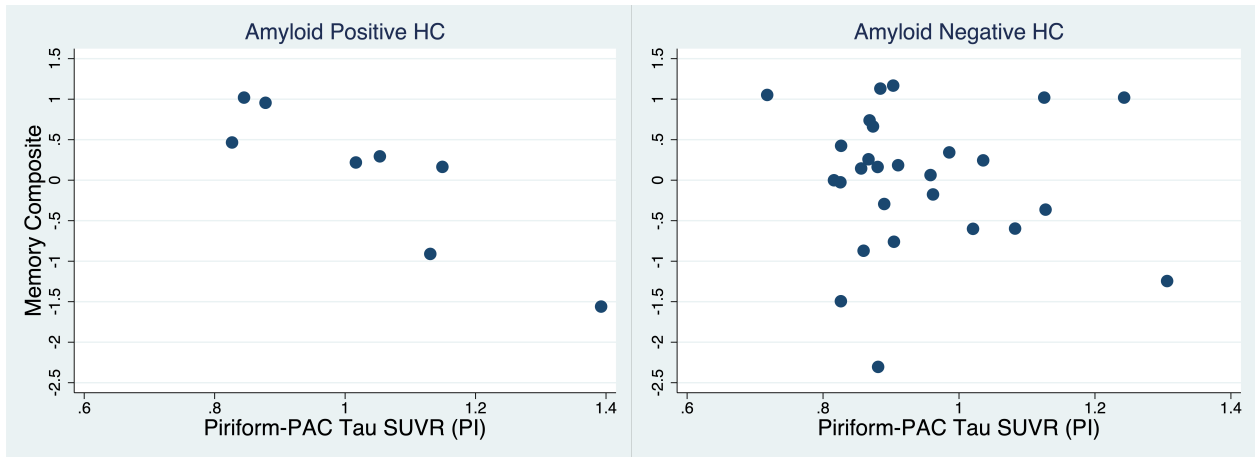

**Figure S5:** SAMS behavioral results. *Left:* The memory composite of Amyloid+HC showed a significant negative monotonic relationship relative to piriform-PAC tau uptake ( $p=0.037$ ). *Right:* Amyloid-HC showed no significant such relationship ( $p>0.05$ ).
