# Supplementary material for: Elevated tau in the piriform cortex in Alzheimer's but not Parkinson's disease using PET‐MR
Source: PubMed Central journal article supplement — Alzheimers Dement (Amst). 2024 Nov 23;16(4):e70040. doi: 10.1002/dad2.70040 (PMC11585164; doi:10.1002/dad2.70040), 2024-11-23
Supplement: DAD2-16-e70040-s007.pdf [file DAD2-16-e70040-s007.pdf]

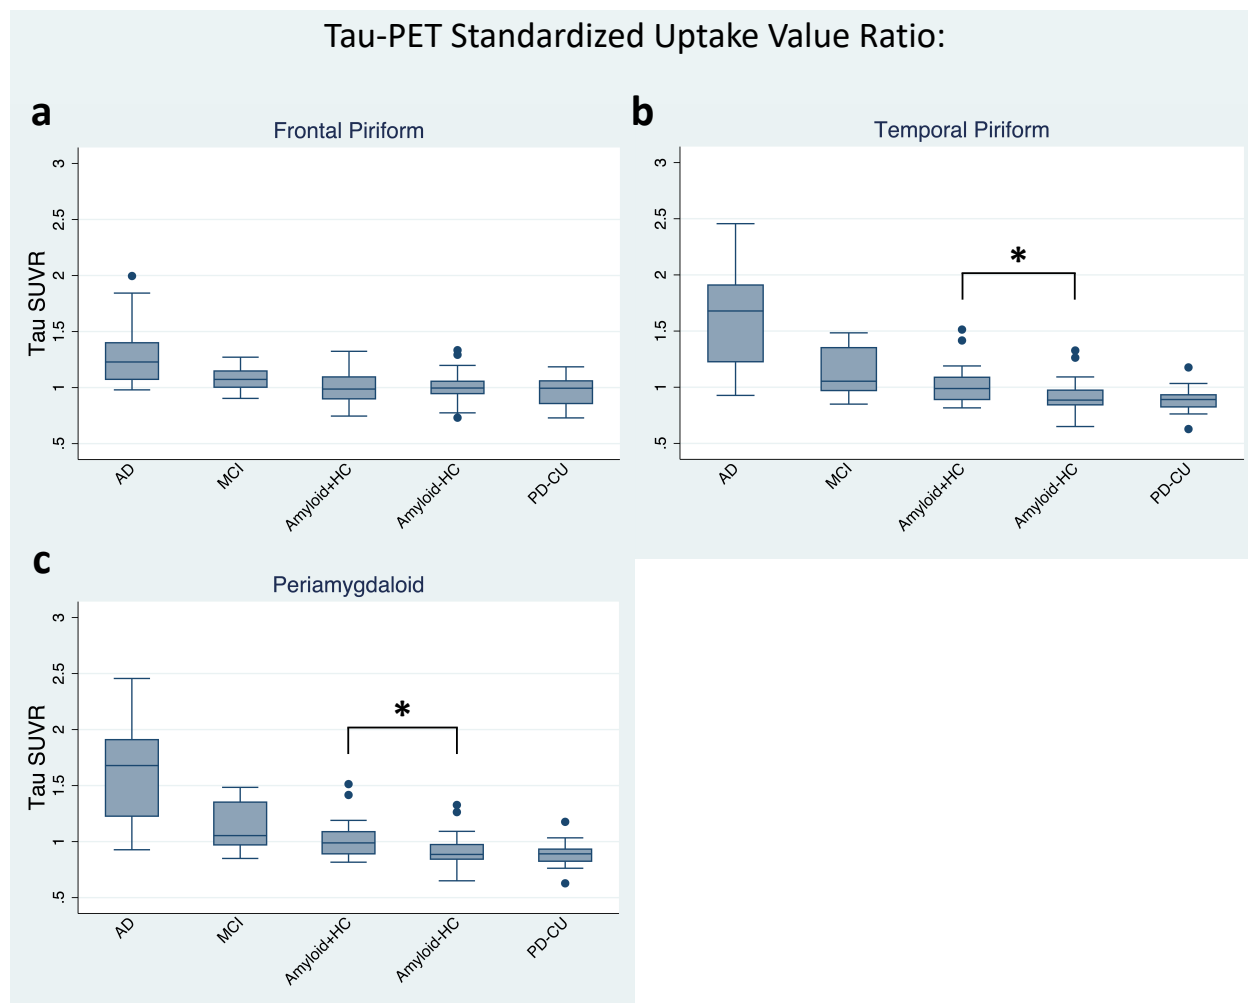

**Figure S2:** Tau uptake in PirF, PirT, and periamygdaloid cortex. **a) Frontal piriform:** The tau SUVR values were sequentially higher in AD, MCI, Amyloid+HC, and Amyloid-HC ( $J^*=-3.213$ ,  $p<0.001$ ). Ranksum test showed that amyloid+HC and amyloid-HC did not have a significant tau uptake difference ( $p=0.745$ ). **b) Temporal piriform:** The tau SUVR values were sequentially higher in AD, MCI, Amyloid+HC, and Amyloid-HC ( $J^*=-5.893$ ,  $p<0.001$ ). Ranksum test showed that Amyloid+HC had more tau uptake compared to Amyloid-HC ( $p=0.049$ ). **c) Periamygdaloid:** The tau SUVR values were sequentially higher in AD, MCI, Amyloid+HC, and Amyloid-HC ( $J^*=-5.637$ ,  $p<0.001$ ). Ranksum test showed that Amyloid+HC had more tau uptake compared to Amyloid-HC ( $p=0.021$ ).
