# Supplementary material for: Elevated tau in the piriform cortex in Alzheimer's but not Parkinson's disease using PET‐MR
Source: PubMed Central journal article supplement — Alzheimers Dement (Amst). 2024 Nov 23;16(4):e70040. doi: 10.1002/dad2.70040 (PMC11585164; doi:10.1002/dad2.70040), 2024-11-23
Supplement: DAD2-16-e70040-s008.pdf [file DAD2-16-e70040-s008.pdf]

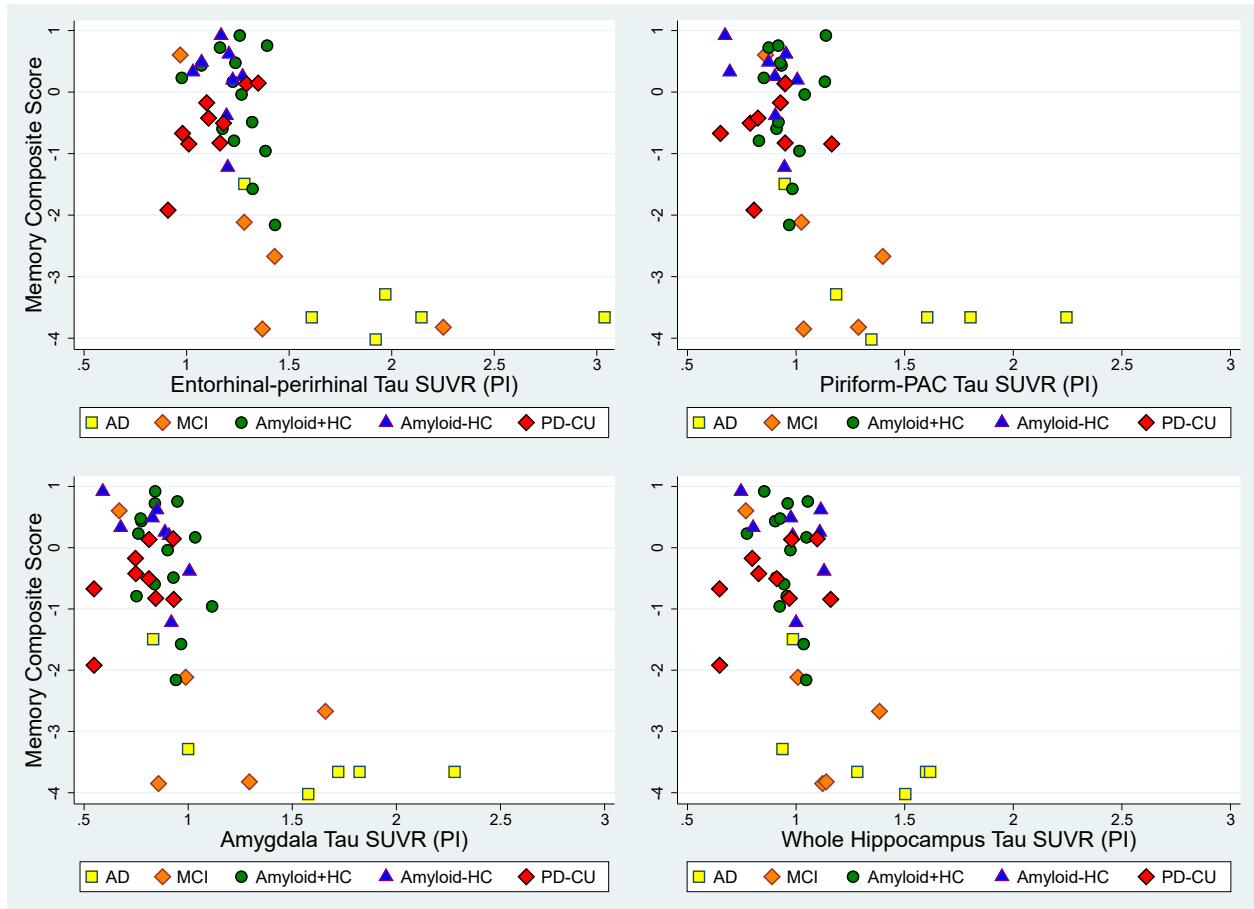

**Figure S4:** ADRC behavioral results correlated with all subregions. The memory composite score displayed a negative monotonic relationship relative to tau uptake in all four regions across all cohorts ( $p < 0.001$ ).
