# Supplementary figures and images for: Elevated tau in the piriform cortex in Alzheimer's but not Parkinson's disease using PET‐MR
Source: PubMed Central journal article supplement — Alzheimers Dement (Amst). 2024 Nov 23;16(4):e70040. doi: 10.1002/dad2.70040 (PMC11585164; doi:10.1002/dad2.70040), 2024-11-23

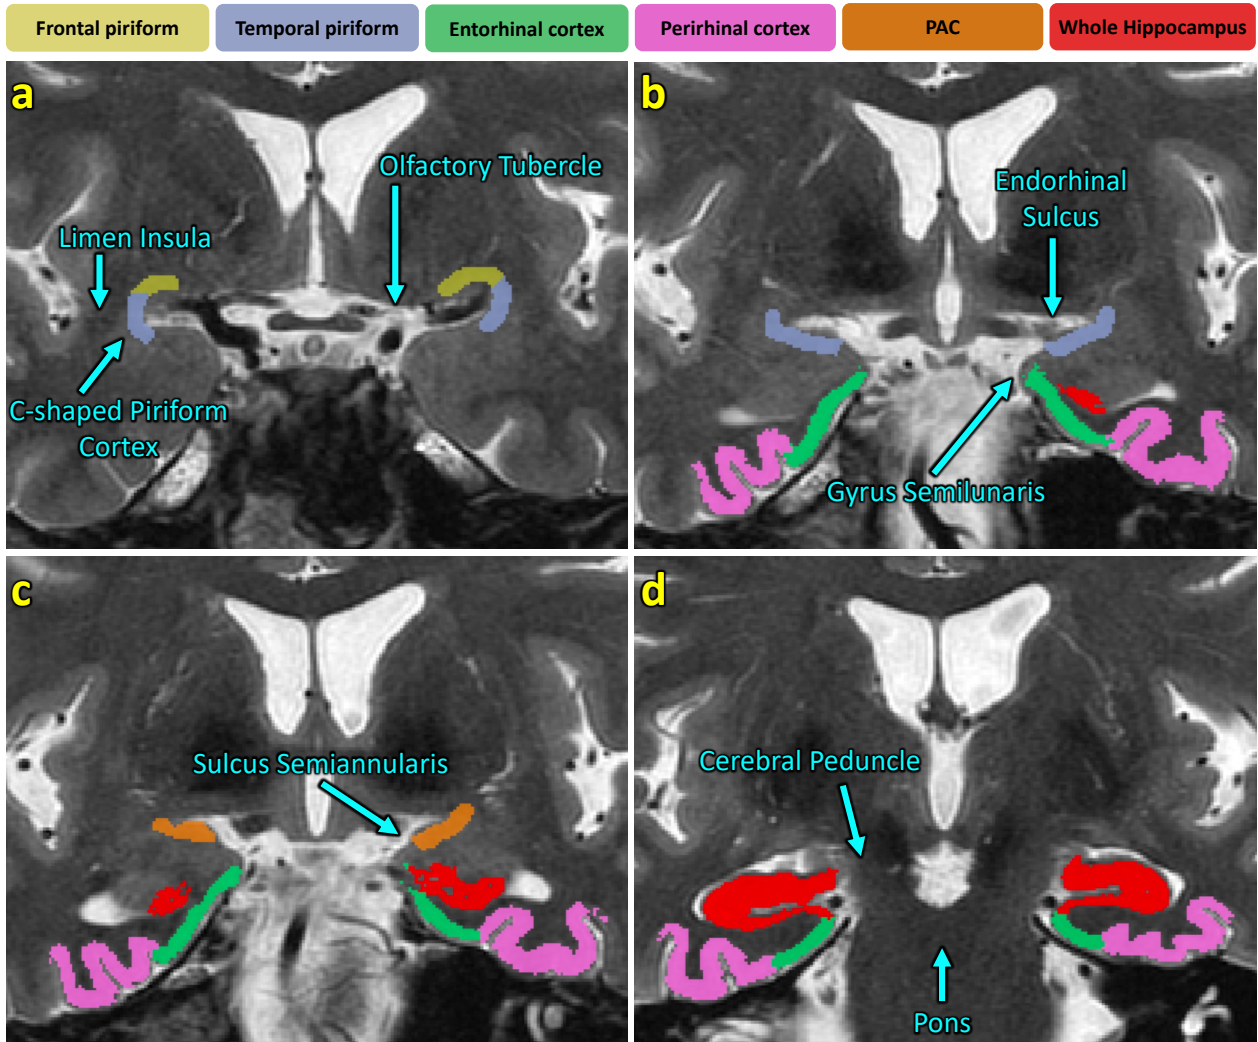

**Figure S1:** Piriform segmentation procedure overlaid on a T2-weighted fast spin echo images.

Supplement: DAD2-16-e70040-s001.pdf [file DAD2-16-e70040-s001.pdf]
